# Supplementary material for: Characterization of Extracellular Polymeric Substances Produced by an Acidianus Species and Their Relevance to Bioleaching
Source: MDPI journal article supplement (doi:10.3390/min13030310), 2023-02-23
Supplement: s1 [file s1]

Archive with 1 entries (1 files):
- minerals-2195492-supplementary.pdf
