# Supplementary material for: Characterization of Extracellular Polymeric Substances Produced by an Acidianus Species and Their Relevance to Bioleaching
Source: MDPI journal article supplement (doi:10.3390/min13030310), 2023-02-23
Supplement: s1 [file s1 › minerals-2195492-supplementary.pdf]

Supplementary Materials

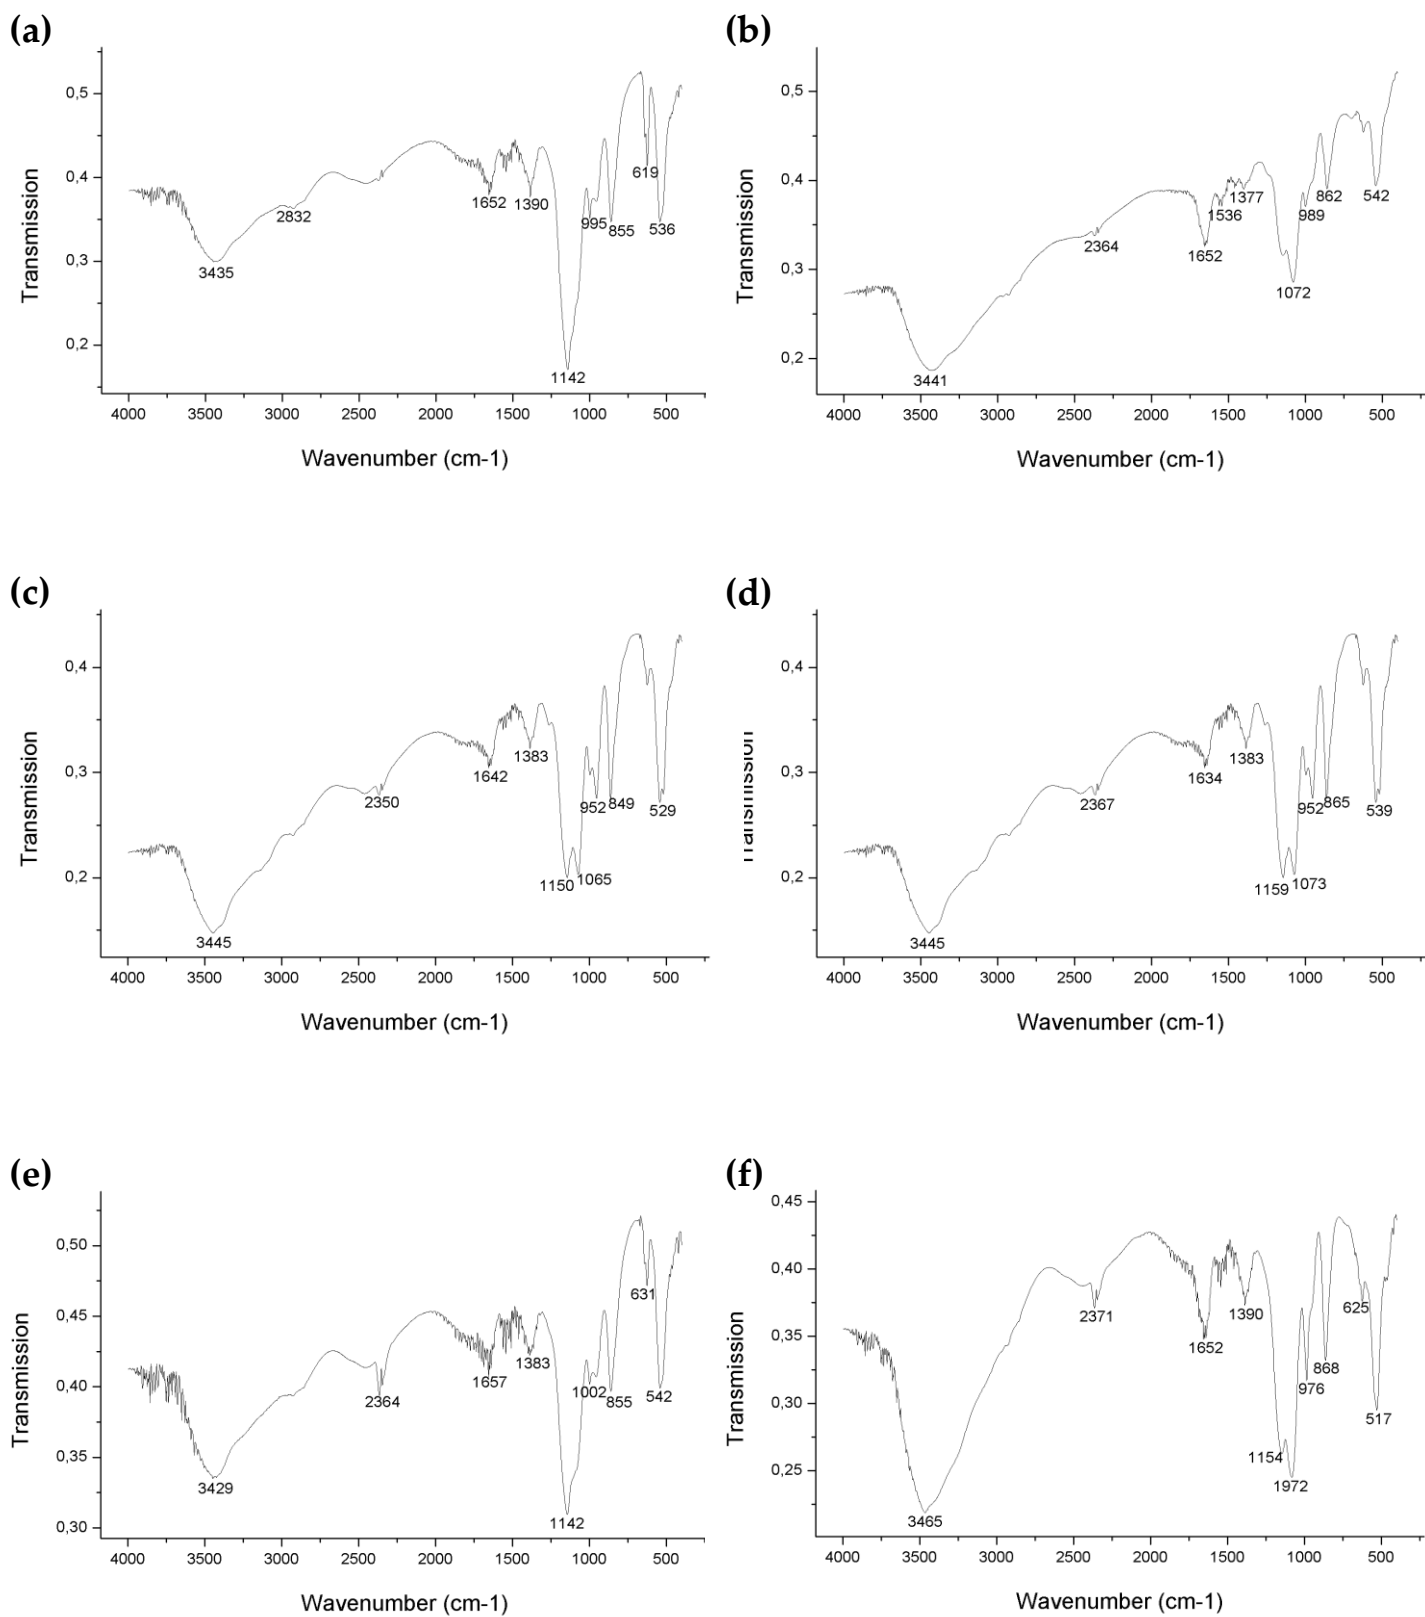

**Figure S1.** FTIR spectra of EPS produced by *A. copahuensis* cells grown with glucose (a); yeast extract (b); tetrathionate and yeast extract (c); tetrathionate (d); pyrite planktonic cells (e) and sessile cells (f).
